# Supplementary material
Source: PubMed Central journal article supplement (PMC470743)
Supplement: pnas_101_26_9728__3.pdf [file pnas_101_26_9728__3.pdf]

Dm 1 MDSKRAALESGDGPDAKRLDTTDDQDK--EASGGDGSQVMLAKHVAPYTG  
Da 1 MDSKRAALETGDGPDAKRMATAEEQEKPEELLPGDGNQIALGKHIPPYTG  
Dp 1 MDLKRCPPAIGTGADSKRPKKN-QDK-GIEIPGDGN---P-QNLPPCSP

Dm 49 HGCTPPM-ESYLFEP TPAGSOLLPWKTS--VDLDND----AELEKPTS-D  
Da 51 NGCSPSM-ESFMFQQTTPAGSOLLPWATAECQTSND----LDLDKSTSGN  
Dp 45 DNCSVSLPESHVSPKTAVGAQPGSWQAET-INSDCDTGSLSEFDRNSLWK

Dm 91 KKPDTA--KLSRRELAKMRREHTLRALALERELTNKPGQTPASEVLLVRF  
Da 96 KKTEAANSKLSRRELAKLRREHTMRALALERELTVKPGHGQPSVLLIRF  
Dp 94 KDIHGN--KLSRREMARVRRMESLKCLELERELGSKSCEDTASVVLFI RF

Dm 139 PDPEITAPMLAGLSKDIRDVVLPI SVAPRYCLVHLKAGADVEATI CDINR  
Da 146 PDPEITAPMLAGLSKDIRDVVL PSSVAPRYCLVHLKPGADVEATIADINK  
Dp 142 PDPEISTAMVAGLSPAIRDVGVPSQLEPRYCMVHLKI GADV DSTISEINQ

Dm 189 VRFGTGHLRAELKPFSDDEEQA EFIDPCSLYVGNIPFNMTTSAIKAYFANA  
Da 196 VRFGGGYLQAEHKPFSDDEEQA EFIDPCSLYVSNIPFNMATSAIKAYFTHA  
Dp 192 VRFNGFLVAERKEYSAEEAKLIDPCSLYVSNIPFHMTTSAIKGFFVRS

Dm 239 MRVDIGVLKREKRARYAFVRYASPDQ TMEAFKELVDSP-LNSRTLTVRYR  
Da 246 MRVDIGVLKREKRARYAFVRYASPEVTMDAFREL VGSPLNSRTLTVRYR  
Dp 242 MRVDVGVLRTTEKRARYAFVRYATTELAREAFREL SRSPLNSRTLTVRFR

Dm 288 RLRKRAGMPMVQCATS FQALQSPNGDDD---NTDCKVISPPPLESITISD  
Da 295 RLRKRAGLPTVQCTNSNL TITSPVGDDD---NADCKVISTPPMESITISD  
Dp 292 RIKKRPGQFKLQPNP SNLTINTLATDDDDAADADCKVISPPPVESITISD

Dm 335 SD-NCS DSSGNGKEDGKRKKKINEQEREIEKLKRQMAEYGAI IKSLOFRQ  
Da 342 SD-NCS DSSADAGRRRRRKNKMTDHEKEIQKLKRQMAEYGS I IKNLOVRQ  
Dp 342 SDGNCSDSNGATKEKAKRKS KMTEHEMEIQKLKLQMAEYGAI IKSLOARQ

Dm 384 NSLEDTFIPDLTPKVEPSVNPTGCL--LGSNAVHLMRDIKKECDYLGIP-  
Da 391 N-IGDLIIANLPPKEEPCANPSACIPVLGSTAVHLMRDIKTERAYLGIPD  
Dp 392 D-----ISDLSPKLEPSSYP EMCRRHARVPTPVHLIQDIKAECAYLGLP-

Dm 430 ---DPVPATKPTTQAQD---DSQKKA KRSCFGRLFTGPF---RRGTSAM  
Da 440 EGTDPPEPAHKPTTQPEEV--HADDRIKTKSPAR KSAK---QTQEKTK  
Dp 435 EVTAEHEPAFRPTTLPI DKPGQND DPKKTKSLARLAKSPKPADEKTTASK

Dm 471 KTADEYEKDDRLEELYAQLERDPDP  
Da 485 ASTASPDKEGRLEELYAQLES DAET  
Dp 485 ATQASPEKDARLEELYAQLET DIDT
