# Supplementary material
Source: PubMed Central journal article supplement (PMC470743)

*D. buckii* male

DAPI

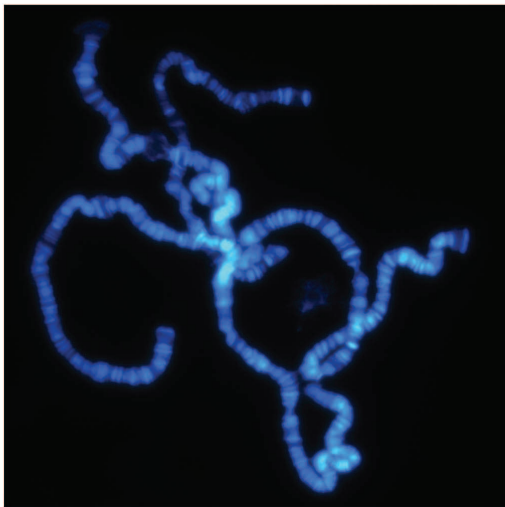

POF

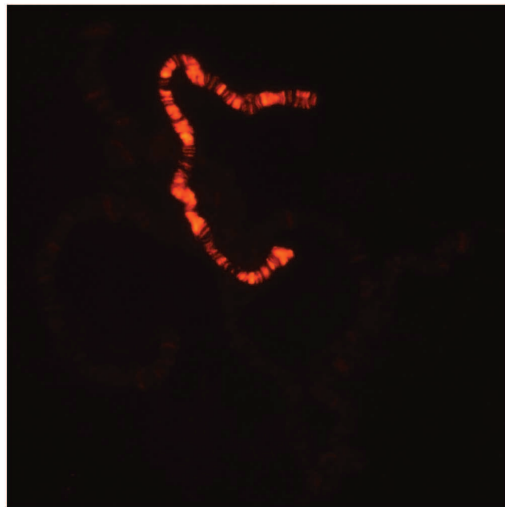

H4K16ac

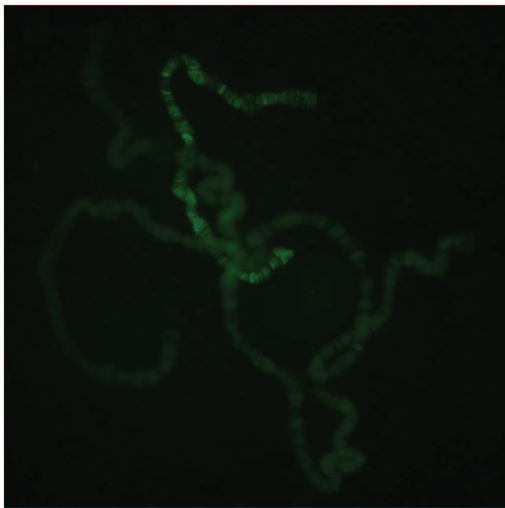

POF/H4K16ac

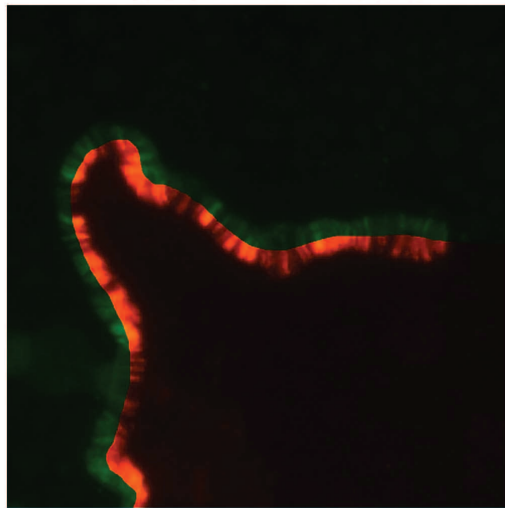

Supplement: pnas_101_26_9728__1.pdf [file pnas_101_26_9728__1.pdf]

*D. ananassae*  
female

DAPI

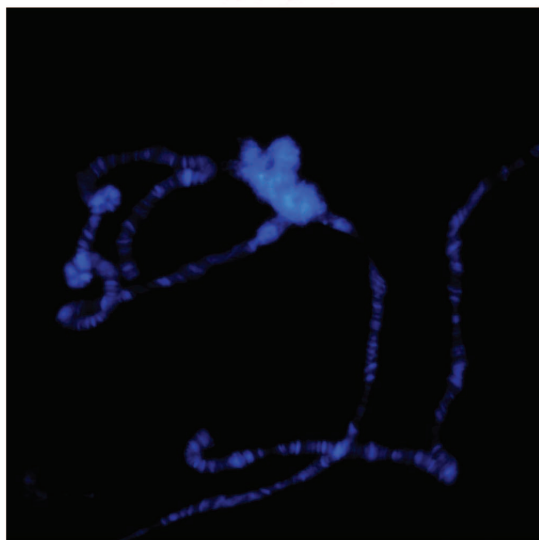

POF

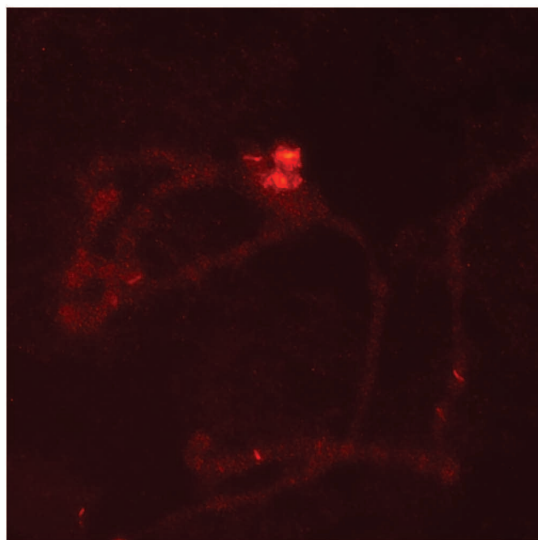

DAPI

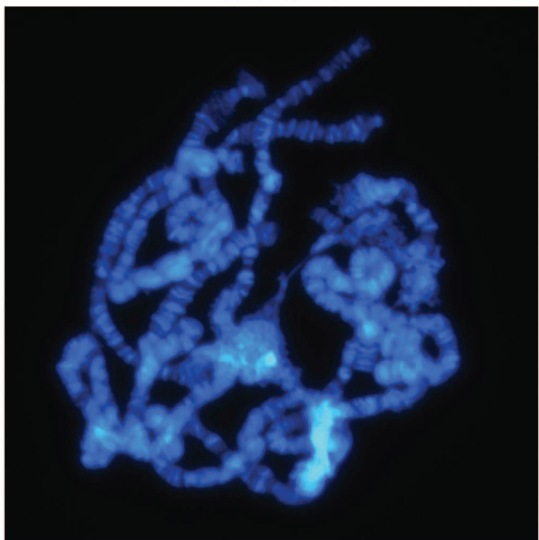

POF

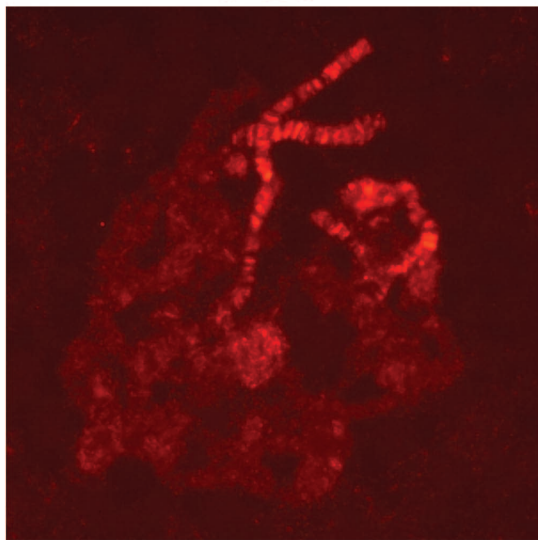

*D. malerkotliana* male

MSL3

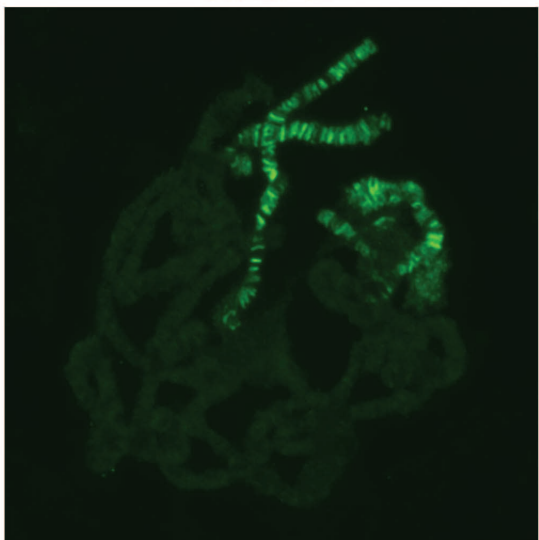

POF/MSL3

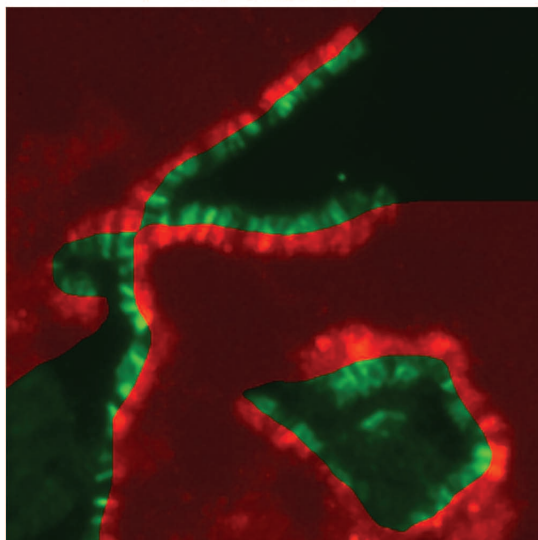

Supplement: pnas_101_26_9728__2.pdf [file pnas_101_26_9728__2.pdf]
